# Supplementary material for: Mechanism of Oxytocin-Induced Contraction in Rat Gastric Circular Smooth Muscle
Source: MDPI journal article supplement (doi:10.3390/ijms24010441), 2022-12-27
Supplement: s1 [file s1]

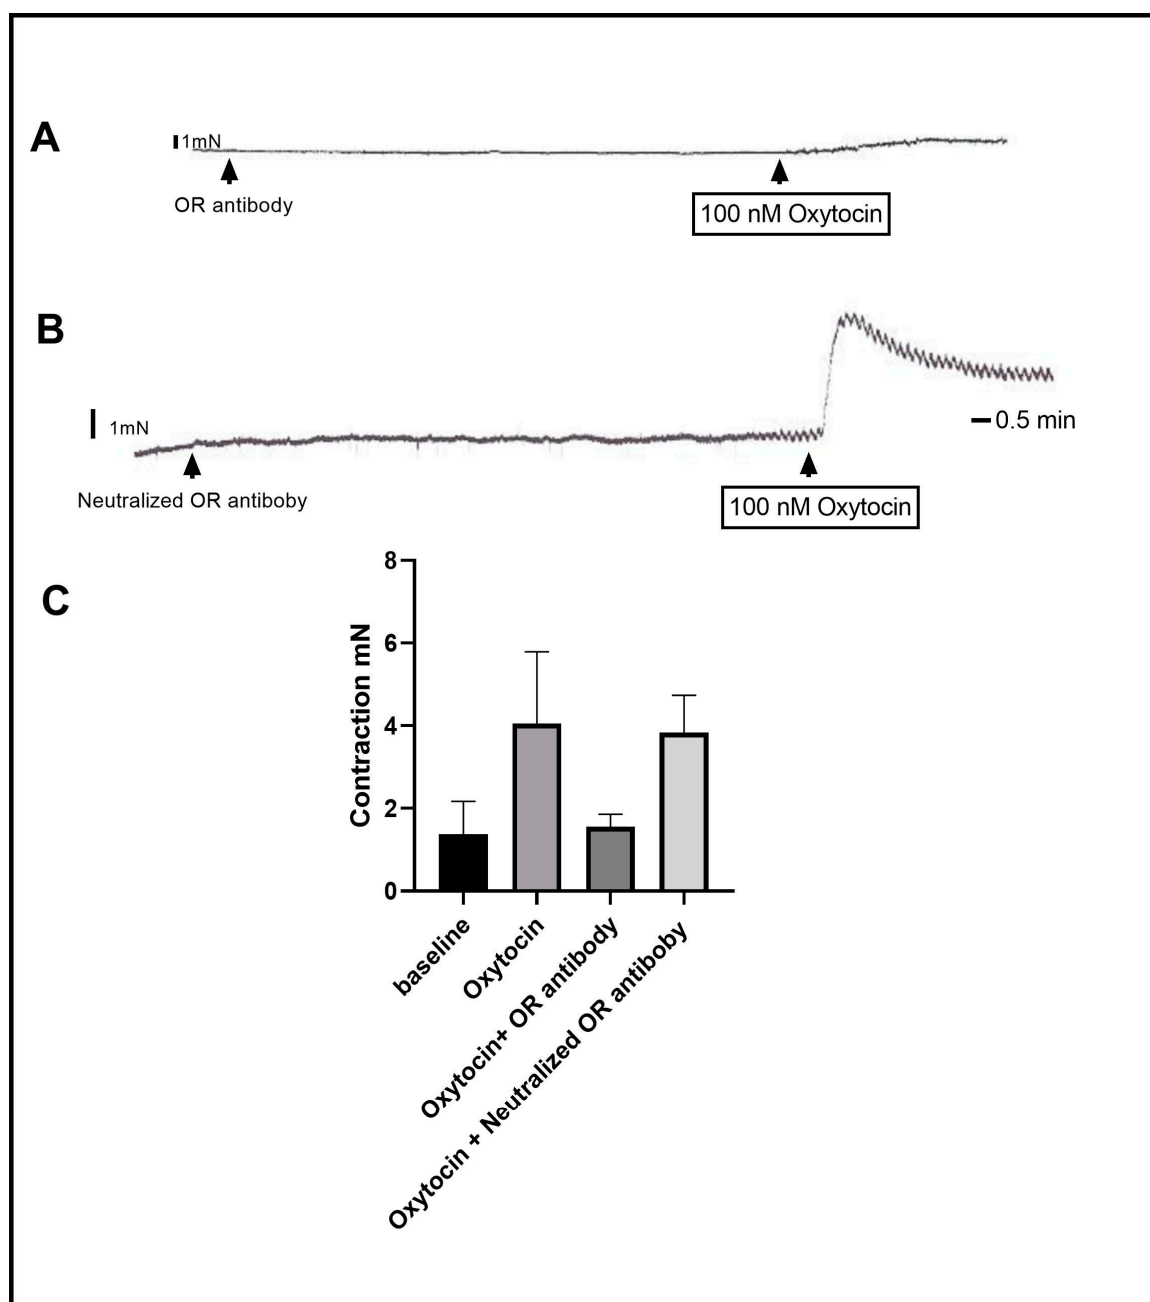

**Figure S1.** Effect of oxytocin receptor (OR) inhibition with OR antibody on oxytocin-induced contraction.
